# Supplementary material for: How to communicate and educate more effectively on natural risk issues to improve disaster risk management through serious games
Source: Copernicus journal article supplement (doi:10.5194/nhess-25-3939-2025), 2025-10-14
Supplement: Supplementary file 1 [file Supplementary material S1.pdf › Supplementary material S1.pdf]

**Supplementary material S1: Games on natural hazards.****Table S1.** Games on natural hazards found in the literature review.

| Game                                                                  | Supplier / website                                                                                                                      |
|-----------------------------------------------------------------------|-----------------------------------------------------------------------------------------------------------------------------------------|
| <i>Phone and table apps</i>                                           |                                                                                                                                         |
| Sai Fah - The Flood Fighter                                           | Opendream Co., Ltd.                                                                                                                     |
| Earthquake Safety Tips - How To Protect Yourself                      | BABYBUS CO., LIMITED                                                                                                                    |
| Seismic Safety - earthquake protection (available only in Chinese)    | Zhi Yong Information                                                                                                                    |
| Earthquake Relief & Rescue Simulator                                  | Atif Mumtaz                                                                                                                             |
| The Earth by Tinybop (payment required for download)                  | Tinybop Inc.                                                                                                                            |
| How It Works? (payment required for download)                         | Learny Land S.L.                                                                                                                        |
| Pompeii Run Volcano Escape                                            | Big Goose Egg, LLC                                                                                                                      |
| Volcano Defense                                                       | Adknown Inc.                                                                                                                            |
| Geostorm                                                              | Talespin, LLC                                                                                                                           |
| Emergency hero flood rescue                                           | Adeel Ahmad                                                                                                                             |
| Lifeboat Rescue - Save Life                                           | Atif Mumtaz                                                                                                                             |
| Disaster Rescue Service                                               | Syd Umer Aftab                                                                                                                          |
| <i>Online games</i>                                                   |                                                                                                                                         |
| Build a kit                                                           | <a href="https://www.ready.gov/kids/games/data/bak-english/index.html">https://www.ready.gov/kids/games/data/bak-english/index.html</a> |
| Disaster Master                                                       | <a href="https://www.ready.gov/kids/games/data/dm-english/">https://www.ready.gov/kids/games/data/dm-english/</a>                       |
| Earth Girl. The Natural Disaster Master (difficulty downloading game) | <a href="https://earthgirl2.com/level-and-character-art/">https://earthgirl2.com/level-and-character-art/</a>                           |

|                                                                                                  |                                                                                                                                                                                                 |
|--------------------------------------------------------------------------------------------------|-------------------------------------------------------------------------------------------------------------------------------------------------------------------------------------------------|
| content required to play the game on the PC)                                                     |                                                                                                                                                                                                 |
| Earthquake Response (difficulty downloading game content required to play the game on the PC)    | <a href="http://www.enabledgames.com.au/stc/">http://www.enabledgames.com.au/stc/</a>                                                                                                           |
| Extreme Event Game (min. 6 players)                                                              | <a href="https://learn.labx.org/ee-download">https://learn.labx.org/ee-download</a>                                                                                                             |
| Stop Disasters                                                                                   | <a href="https://www.stopdisastersgame.org/">https://www.stopdisastersgame.org/</a>                                                                                                             |
| Act to adapt                                                                                     | <a href="https://www.climatecentre.org/games/2541/act-to-adapt/">https://www.climatecentre.org/games/2541/act-to-adapt/</a>                                                                     |
| Before the storm                                                                                 | <a href="http://petlab.parsons.edu/redCrossSite/rulesBTS.html#downloadsBTS">http://petlab.parsons.edu/redCrossSite/rulesBTS.html#downloadsBTS</a>                                               |
| Buzz about Dengue                                                                                | <a href="https://www.climatecentre.org/games/2530/buzz-about-dengue/">https://www.climatecentre.org/games/2530/buzz-about-dengue/</a>                                                           |
| Cultural Memory Game: Earthquake and Flood version                                               | <a href="https://culturalmemory.socialsimulations.org/">https://culturalmemory.socialsimulations.org/</a>                                                                                       |
| Board games with downloadable materials available                                                |                                                                                                                                                                                                 |
| Act to adapt                                                                                     | <a href="https://www.climatecentre.org/games/2541/act-to-adapt/">https://www.climatecentre.org/games/2541/act-to-adapt/</a>                                                                     |
| Before the storm                                                                                 | <a href="http://petlab.parsons.edu/redCrossSite/rulesBTS.html#downloadsBTS">http://petlab.parsons.edu/redCrossSite/rulesBTS.html#downloadsBTS</a>                                               |
| Buzz about Dengue                                                                                | <a href="https://www.climatecentre.org/games/2530/buzz-about-dengue/">https://www.climatecentre.org/games/2530/buzz-about-dengue/</a>                                                           |
| Cultural Memory Game: Earthquake and Flood version                                               | <a href="https://culturalmemory.socialsimulations.org/">https://culturalmemory.socialsimulations.org/</a>                                                                                       |
| Decisions for the decade                                                                         | <a href="https://www.climatecentre.org/games/2520/decisions-for-the-decade/">https://www.climatecentre.org/games/2520/decisions-for-the-decade/</a>                                             |
| Dissolving Disasters (especially because it involves communication and how to handle the moment) | <a href="https://www.climatecentre.org/games/2516/dissolving-disasters/">https://www.climatecentre.org/games/2516/dissolving-disasters/</a>                                                     |
| Evacuation Board Game                                                                            | <a href="http://www.floodsite.net/juniorfloodsite/html/en/student/thingstodo/games/boardgame.html">http://www.floodsite.net/juniorfloodsite/html/en/student/thingstodo/games/boardgame.html</a> |
| Evacuation Challenge Game                                                                        | <a href="https://evacuationchallenge.socialsimulations.org/">https://evacuationchallenge.socialsimulations.org/</a>                                                                             |

|                                                                                                 |                                                                                                                                                                                                                             |
|-------------------------------------------------------------------------------------------------|-----------------------------------------------------------------------------------------------------------------------------------------------------------------------------------------------------------------------------|
| Evacuation Role Play Game                                                                       | <a href="http://www.floodsite.net/juniorfloodsite/html/en/student/thi&lt;br/&gt;ngstodo/games/roleplayinggame.html">http://www.floodsite.net/juniorfloodsite/html/en/student/thi<br/>ngstodo/games/roleplayinggame.html</a> |
| Flood Resilience Games                                                                          | <a href="https://floodresilience.socialsimulations.org/">https://floodresilience.socialsimulations.org/</a>                                                                                                                 |
| Game of Floods                                                                                  | <a href="https://www.marincounty.org/depts/cd/divisions/planning/c&lt;br/&gt;smart-sea-level-rise/game-of-floods">https://www.marincounty.org/depts/cd/divisions/planning/c<br/>smart-sea-level-rise/game-of-floods</a>     |
| Gender and Climate Game                                                                         | <a href="https://www.climatecentre.org/games/2510/gender-and-&lt;br/&gt;climate-game/">https://www.climatecentre.org/games/2510/gender-and-<br/>climate-game/</a>                                                           |
| Gifts of Culture: Diversity in the<br>context of flood resilience                               | <a href="https://giftsofculture.socialsimulations.org/en/">https://giftsofculture.socialsimulations.org/en/</a>                                                                                                             |
| Lords of the Valley: Experience and<br>explore sustainable practices in<br>complex environments | <a href="https://lordsofthevalley.socialsimulations.org/">https://lordsofthevalley.socialsimulations.org/</a>                                                                                                               |
| Paying for Predictions                                                                          | <a href="https://www.climatecentre.org/games/2501/paying-for-&lt;br/&gt;predictions/">https://www.climatecentre.org/games/2501/paying-for-<br/>predictions/</a>                                                             |
| Ready!                                                                                          | <a href="https://www.climatecentre.org/games/2497/ready/">https://www.climatecentre.org/games/2497/ready/</a>                                                                                                               |
| Riskland                                                                                        | <a href="https://www.unisdr.org/2004/campaign/pa-camp04-&lt;br/&gt;riskland-eng.htm">https://www.unisdr.org/2004/campaign/pa-camp04-<br/>riskland-eng.htm</a>                                                               |
| Save Natalie! The preparedness game                                                             | <a href="http://helid.digicollection.org/en/d/Jdnd24/5.html">http://helid.digicollection.org/en/d/Jdnd24/5.html</a>                                                                                                         |
| Upstream Downstream                                                                             | <a href="https://preparecenter.org/resource/the-upstream-&lt;br/&gt;downstream-game-2/">https://preparecenter.org/resource/the-upstream-<br/>downstream-game-2/</a>                                                         |
| Weather or Not                                                                                  | <a href="https://petlab.parsons.edu/redCrossSite/rulesWON.html">https://petlab.parsons.edu/redCrossSite/rulesWON.html</a>                                                                                                   |
