# Supplementary material for: How to communicate and educate more effectively on natural risk issues to improve disaster risk management through serious games
Source: Copernicus journal article supplement (doi:10.5194/nhess-25-3939-2025), 2025-10-14
Supplement: Supplementary file [file nhess-25-3939-2025-supplement-title-page.pdf › nhess-25-3939-2025-supplement-title-page.pdf]

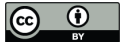

## *Supplement of*

# **How to communicate and educate more effectively on natural risk issues to improve disaster risk management through serious games**

**Mercedes Vázquez-Vílchez et al.**

*Correspondence to:* Mercedes Vázquez-Vílchez ([mmvazquez@ugr.es](mailto:mmvazquez@ugr.es))

- [nhess-25-3939-2025-supplement-title-page.pdf](#)
- [Supplementary material S1.pdf](#)
- [Supplementary material S2.pdf](#)
- [Supplementary material S3.pdf](#)
- [Supplementary material S4.pdf](#)

The copyright of individual parts of the supplement might differ from the article licence.
